# Supplementary material for: Influence of crystal structure on the electrochemical performance of A-site-deficient Sr1−sNb0.1Co0.9O3−δ perovskite cathodes
Source: Royal Society of Chemistry journal article supplement (doi:10.1039/c4ra06191h), 2014-01-01
Supplement: c4ra06191h1.pdf [file c4ra06191h1.pdf]

## Supporting Information

### Influence of crystal structure on the electrochemical performance of

#### A-site-deficient $\text{Sr}_{1-s}\text{Nb}_{0.1}\text{Co}_{0.9}\text{O}_{3-\delta}$ perovskite cathodes

Yinlong Zhu,<sup>a</sup> Ye Lin,<sup>b</sup> Xuan Shen,<sup>c,d</sup> Jaka Sunarso,<sup>e</sup> Wei Zhou\*<sup>f</sup> Shanshan Jiang,<sup>a</sup>  
Dong Su,<sup>c</sup> Fanglin Chen,<sup>b</sup> and Zongping Shao\*<sup>g</sup>

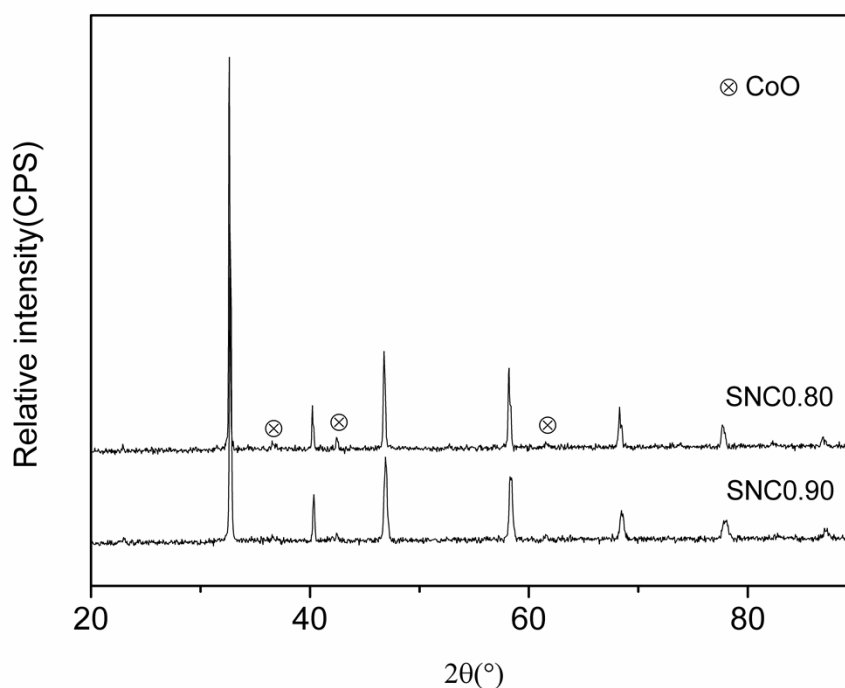

**Fig. S1.** XRD patterns of SNC0.90 and SNC0.80 powders synthesized at 1200 °C.

**Table S1.** The reliability factors of Le Bail refinements on XRD patterns of SNC0.98 using model based on Pm-3m, P4mm and P4mm space group.

| Phase model | $R_{wp}$ (%) | $R_p$ (%) | $\chi^2$ |
|-------------|--------------|-----------|----------|
| Pm-3m       | 3.70         | 2.86      | 1.26     |
| P4mm        | 3.40         | 2.64      | 1.16     |
| P4/mmm      | 3.54         | 2.77      | 1.22     |

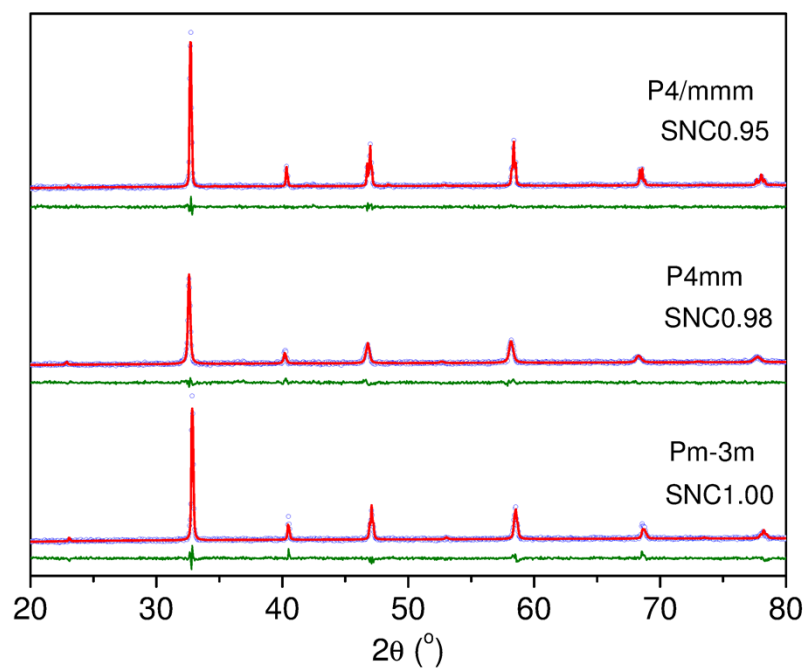

**Fig. S2.** Reitveld refinements of SNC1.00, SNC0.98 and SNC0.95 XRD patterns.

**Table S2.** Lattice parameters of SNC1.00, SNC0.98 and SNC0.95 based on Rietveld refinement.

| SNC1.00                 |           | SNC0.98         |           | SNC0.95         |           |
|-------------------------|-----------|-----------------|-----------|-----------------|-----------|
| Pm-3m                   |           | P4mm            |           | P4/mmm          |           |
| a                       | 3.873(19) | a               | 3.879(02) | a               | 3.870(55) |
|                         |           | c               | 3.892(20) | c               | 7.777(97) |
| Sr                      |           | Sr              |           | Sr              |           |
| x                       | 0.5       | x               | 0         | x               | 0.5       |
| y                       | 0.5       | y               | 0         | y               | 0.5       |
| z                       | 0.5       | z               | 0         | z               | 0.26186   |
| Occ                     | 1.0       | Occ             | 0.98      | Occ             | 0.95      |
| Co/Nb                   |           | Co/Nb           |           | Co1/Nb1         |           |
| x                       | 0.0       | x               | 0.5       | x               | 0         |
| y                       | 0.0       | y               | 0.5       | y               | 0         |
| z                       | 0.0       | z               | 0.52804   | z               | 0         |
| Occ                     | 0.9/0.1   | Occ             | 0.9/0.1   | Occ             | 0.9/0.1   |
| O1                      |           | O1              |           | Co2/Nb2         |           |
| x                       | 0.5       | x               | 0.5       | x               | 0         |
| y                       | 0.0       | y               | 0.5       | y               | 0         |
| z                       | 0.0       | z               | 0.00006   | z               | 0.5       |
| Occ                     | 1         | Occ             | 1         | Occ             | 0.9/0.1   |
|                         |           | O2              |           | O1              |           |
|                         |           | x               | 0.5       | x               | 0.5       |
|                         |           | y               | 0         | y               | 0         |
|                         |           | z               | 0.41723   | z               | 0         |
|                         |           | Occ             | 1         | Occ             | 1         |
|                         |           |                 |           | O2              |           |
|                         |           |                 |           | x               | 0         |
|                         |           |                 |           | y               | 0         |
|                         |           |                 |           | z               | 0.74187   |
|                         |           |                 |           | Occ             | 1         |
|                         |           |                 |           | O3              |           |
|                         |           |                 |           | x               | 0.5       |
|                         |           |                 |           | y               | 0         |
|                         |           |                 |           | z               | 0.5       |
|                         |           |                 |           | Occ             | 1         |
| Reliability factors (%) |           |                 |           |                 |           |
| R <sub>p</sub>          | 3.11      | R <sub>p</sub>  | 2.81      | R <sub>p</sub>  | 2.52      |
| R <sub>wp</sub>         | 4.44      | R <sub>wp</sub> | 3.61      | R <sub>wp</sub> | 3.18      |
| χ <sup>2</sup>          | 1.48      | χ <sup>2</sup>  | 1.23      | χ <sup>2</sup>  | 1.12      |

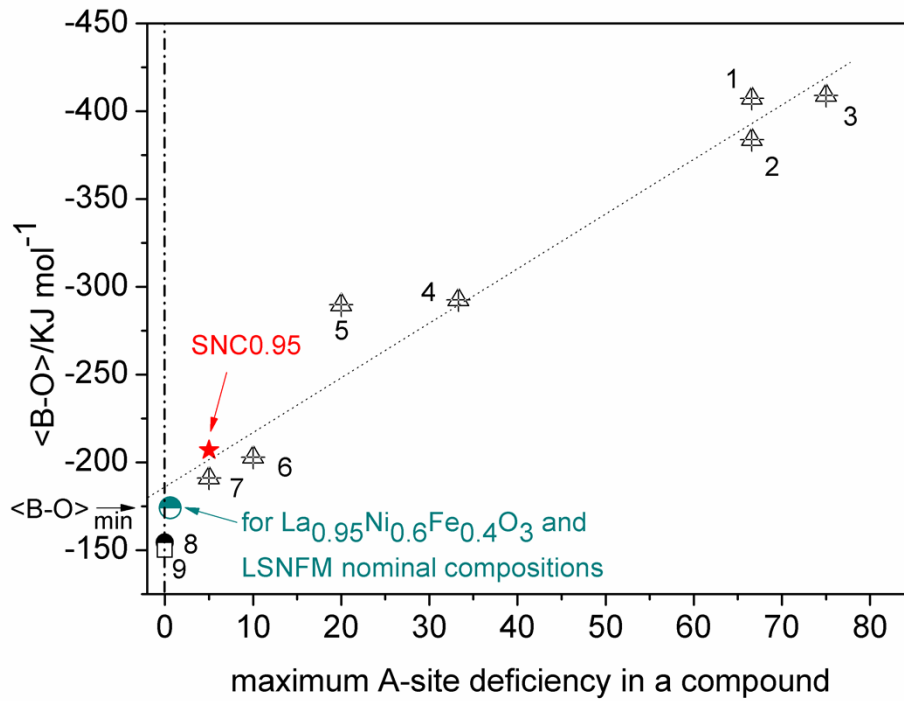

**Fig. S3.** Average B(B', B'')-O (B-O) bond energy between the B and oxygen sublattices estimated from the thermodynamic data for 1. La<sub>1/3</sub>TaO<sub>3</sub>; 2. La<sub>1/3</sub>NbO<sub>3</sub>; 3. Na<sub>0.25</sub>WO<sub>3</sub>; 4. La<sub>2/3</sub>(Ti<sup>4+</sup><sub>0.5</sub>Ti<sup>3+</sup><sub>0.5</sub>)O<sub>3-δ</sub>; 5. La<sub>0.2</sub>Sr<sub>0.6</sub>Ti<sub>0.8</sub>Nb<sub>0.2</sub>O<sub>3</sub>; 6. La<sub>0.9</sub>(Mn<sup>4+</sup><sub>0.5</sub>Mn<sup>3+</sup><sub>0.5</sub>)O<sub>3-δ</sub>; 7. La<sub>0.55</sub>Sr<sub>0.4</sub>Co<sup>3+</sup><sub>0.2</sub>Fe<sup>3+</sup><sub>0.8</sub>O<sub>3</sub>; 8. LaNiO<sub>3-δ</sub>; 9. LaCoO<sub>3-δ</sub>. The data except SNC0.95 are extracted from Ref [1].

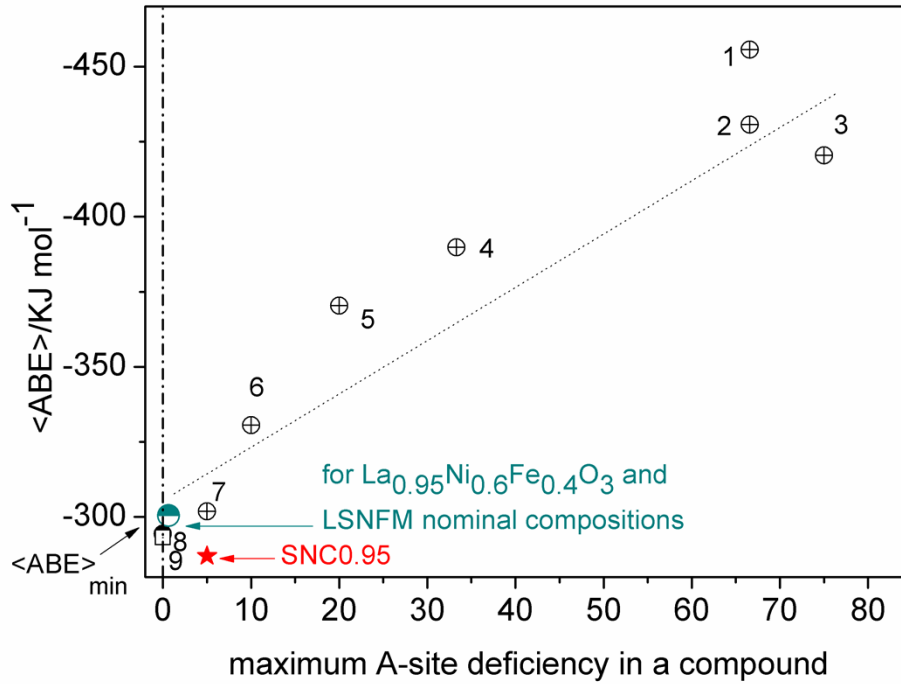

**Fig. S4.** Average metal (A, B)-oxygen bond energy within the perovskite lattice ( $\langle ABE \rangle$ ) estimated from the thermodynamic data for 1.  $\text{La}_{1/3}\text{TaO}_3$ ; 2.  $\text{La}_{1/3}\text{NbO}_3$ ; 3.  $\text{Na}_{0.25}\text{WO}_3$ ; 4.  $\text{La}_{2/3}(\text{Ti}^{4+}_{0.5}\text{Ti}^{3+}_{0.5})\text{O}_{3-\delta}$ ; 5.  $\text{La}_{0.2}\text{Sr}_{0.6}\text{Ti}_{0.8}\text{Nb}_{0.2}\text{O}_3$ ; 6.  $\text{La}_{0.9}(\text{Mn}^{4+}_{0.5}\text{Mn}^{3+}_{0.5})\text{O}_{3-\delta}$ ; 7.  $\text{La}_{0.55}\text{Sr}_{0.4}\text{Co}^{3+}_{0.2}\text{Fe}^{3+}_{0.8}\text{O}_3$ ; 8.  $\text{LaNiO}_{3-\delta}$ ; 9.  $\text{LaCoO}_{3-\delta}$ . The data except SNC0.95 are extracted from Ref [1].

Figure S2 and Figure S3 illustrate the correlation between the maximum A-site deficiency in compounds (data were extracted from the literature [1]) and the average B(B', B'')-O ( $\langle B-O \rangle$ ) bond energy or average metal (A, B)-oxygen bond energy within the perovskite lattice ( $\langle ABE \rangle$ ) estimated from the thermodynamic data. [2] The method of calculating  $\langle A-O \rangle$ ,  $\langle B-O \rangle$  and  $\langle ABE \rangle$  for a cation stoichiometric  $\text{A}_{1-x}\text{A}'_x\text{B}_{1-y-z}\text{B}'_y\text{B}''_z\text{O}_3$  and for A-site deficient ( $(\text{A}_{1-x}\text{A}'_x)_s\text{B}_{1-y-z}\text{B}'_y\text{B}''_z\text{O}_3$ ) compositions were described as follows: [3]

(the following equations applied to A', B' and B'' are similar to A and B)

$$\langle ABE \rangle = \langle A-O \rangle + \langle B-O \rangle \quad (1)$$

$$\langle A-O \rangle = \Delta(A-O) + \Delta(A'-O) \quad (2)$$

$$\langle B-O \rangle = \Delta(B-O) + \Delta(B'-O) + \Delta(B''-O) \quad (3)$$

$$\Delta(A-O) = x_A / (\text{CN}_A * m) * (\Delta H_{\text{AmO}_n} - m * \Delta H_{\text{A-n}/2} * D_{\text{O}_2}) \quad (4a)$$

$$\Delta(A-O) = x_A * s / (\text{CN}_A * m) * (\Delta H_{\text{AmO}_n} - m * \Delta H_{\text{A-n}/2} * D_{\text{O}_2}) \quad (4b)$$

**(in the case of A-site deficiency)**

$$\Delta(B-O) = x_B / (\text{CN}_B * m) * (\Delta H_{\text{BmO}_n} - m * \Delta H_{\text{B-n}/2} * D_{\text{O}_2}) \quad (5)$$

Some parameters of above equations are explained as:

$x_A$  and  $x_B$  : the molar fraction of A and B metals;  
 $s$ : the fraction of A-site deficiency compositions  $(A_{1-x}A'_x)_sB_{1-y-z}B''_yB'''_zO_3$  ( $s < 1$ );  
 $\Delta H_{A(B)mOn}$  and  $\Delta H_{A(B)}$  : the enthalpy of formation of one mole of A(B)mOn oxides and the sublimation energy of A(B) metal at 25 °C; [2]  
 $CN_{A(B)}$ : the coordination number of cations on the A and B sites;  
 $D_{O_2}$ : the dissociation energy of  $O_2$  (500.2 kJ mol<sup>-1</sup>)

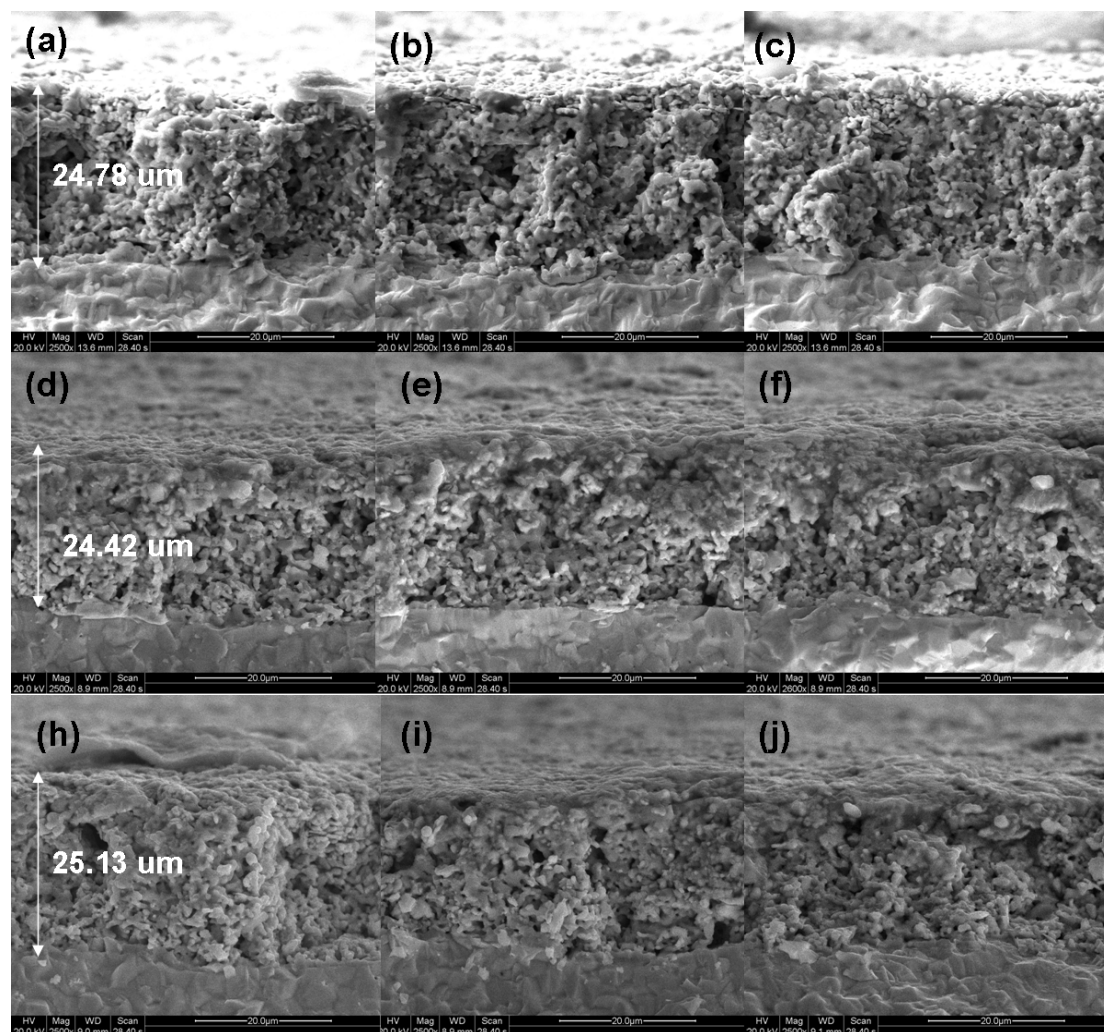

**Fig. S5.** SEM images of (a, b, c) SNC1.00, (d, e, f) SNC0.98 and (h, i, j) SNC0.95 cathodes calcined at 1000 °C for 2 h in air after test. The scale bars of all images are 20 μm.

1. Konyshcheva, E.; Xu, X. X.; Irvine, J. T. S. *Adv. Mater.* **2012**, *24*, 528.
2. Kubaschewski, O.; Alcock, C. B. *Metallurgical Thermochemistry*, 5th Ed., Pergamon Press Ltd., Oxford, UK **1979**, p.391.
3. Voorhoeve, R. J. H.; Remeika, J. P.; Trimbe, L. E. *Ann. N. Y. Acad. Sci.* **1976**, *272*, 3.
